# Supplementary material
Source: PubMed Central journal article supplement (PMC5748327)
Supplement: ja7b10203_si_001.pdf [file ja7b10203_si_001.pdf]

Supporting Information for:

## Mechanism of a Class C Radical SAM Thiazole Methyl Transferase

Zhengan Zhang,<sup>1,2</sup> Nilkamal Mahanta,<sup>1,3</sup> Graham A. Hudson,<sup>1</sup> Douglas A. Mitchell<sup>1,3\*</sup>

and Wilfred A. van der Donk<sup>1-3\*</sup>

<sup>1</sup> Department of Chemistry, University of Illinois at Urbana-Champaign, Urbana, Illinois 61801, USA. <sup>2</sup> Howard Hughes Medical Institute, University of Illinois at Urbana-Champaign, Urbana, Illinois 61801, <sup>3</sup> Institute for Genomic Biology, University of Illinois at Urbana-Champaign, 1206 West Gregory Drive, Urbana, IL, 61801, USA.

\* Corresponding authors:

Wilfred A. van der Donk (vddonk@illinois.edu), phone: 1-217-244-5360, fax: 1-217-244-8533

Douglas A. Mitchell (douglasm@illinois.edu), phone: 1-217-333-1345, fax: 1-217-333-0508

### Table of Contents:

|                                                                                                             |     |
|-------------------------------------------------------------------------------------------------------------|-----|
| Figure S1: Mechanism of class A rSAM MT RlmN.....                                                           | S2  |
| Figure S2: Sequence alignment of select class C rSAM MTs .....                                              | S3  |
| Figure S3: MALDI-TOF MS analysis of the products generated by TbtI variants .....                           | S4  |
| Figure S4: ESI-MS of CD <sub>3</sub> -SAM and its 5'-dA product.....                                        | S5  |
| Figure S5: Production of 5'-dA and SAH.....                                                                 | S6  |
| Figure S6: ESI-MS of ( <sup>13</sup> C, <sup>15</sup> N)-depleted and natural abundance TbtA hexazole ..... | S7  |
| Figure S7: ESI-MS spectra to investigate the solvent exchange of the methyl group .....                     | S8  |
| Figure S8: Synthesis and ESI-MS analysis of CD <sub>3</sub> -5',5',4',3'-D <sub>4</sub> -SAM .....          | S9  |
| Figure S9: ESI-MS spectra ruling out transfer of a hydrogen derived from the protein.....                   | S10 |
| Figure S10: Tandem ESI-MS on TbtA core peptide containing six D <sub>2</sub> -Cys .....                     | S11 |
| Figure S11: MALDI-TOF MS analysis of the products generated by TbtI variants .....                          | S12 |
| Figure S12: Proposed mechanism for exchange of the methyl protons of the product peptide.....               | S13 |
| Table S1: Oligonucleotide primers used in this study .....                                                  | S14 |
| Table S2: Expected and observed masses in Figures 3 and 4.....                                              | S15 |
| Supporting References.....                                                                                  | S16 |

## Supporting Figures

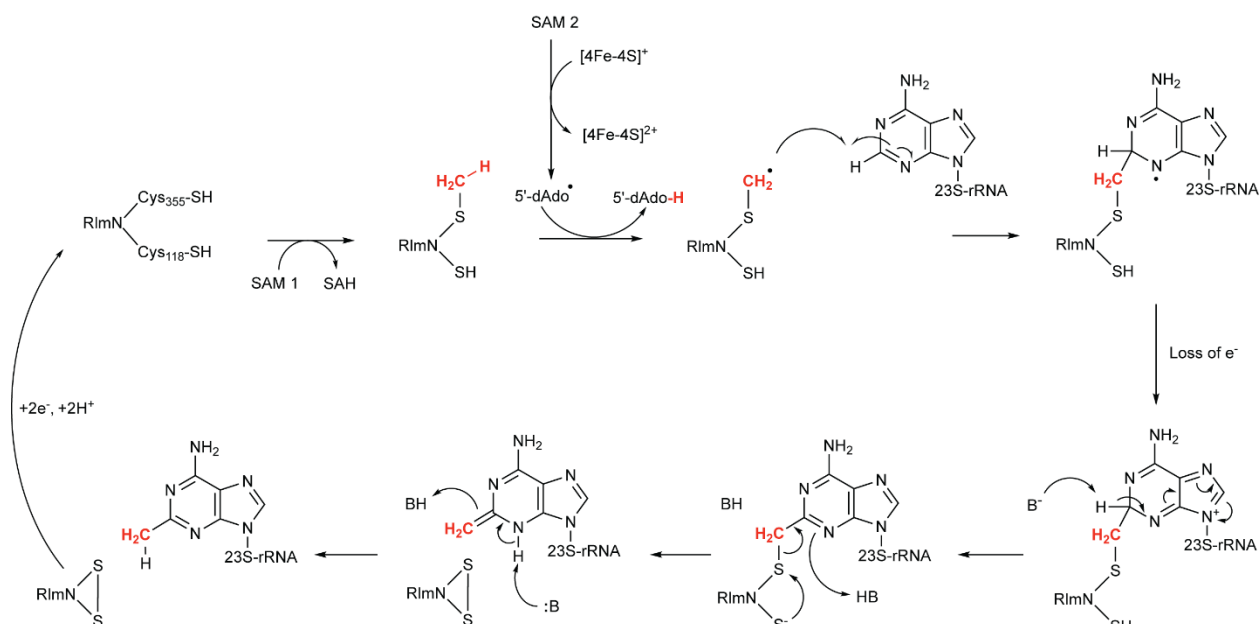

**Figure S1. Mechanism of class A rSAM MT RlmN.<sup>1</sup>** RlmN methylates an adenine in 23S-tRNA by first methylating a Cys in the enzyme, and then using 5'-dA• derived from a second SAM to abstract a hydrogen atom from the methylated Cys. The resulting radical is added to the adenine, and oxidized to a cation. Deprotonation generates a neutral intermediate that is resolved by disulfide bond formation. Since RlmN does not formally transfer a methyl group, but rather a methylene group, class A rSAM MTs could be referred to as methylases.

```

TbtI -----MTRPLLLYVNI P
TpdI -----MTKPLLIYANVP
PbtM2 -----MSTTLRGTGGAVAEQPLLIYVNV P
PbtM3 -----MTT-EAITNALPLTGPKTDEPLLLYVNV P
HemN MSVQQIDWDLALIQKYNYSGRPYTSYPTALEFSEDFGEQAFLLQAVARYPERPLSLYVHIP
      . ** : * . : : *

TbtI FCNSKCHFCDWV VVQIPVRDLRLDQQAPGRIAYLDAVRAQIRGQAPVLR E-HYQPAIIYWG
TpdI FCNSKCHFCDWV VVQVPVRDLRLGEQSPGRVAYLEAIR TQIRVQAPALRE-HYHPDIVYWG
PbtM2 FCNSKCHFCDWV TEVPLADLRLTPDSSPRQRYIAALVQ QIETHAPVLTGFGYRPEIMYWG
PbtM3 FCNSKCHFCDWV VDVPSDLRLTPVSAGRIDYLEALRTQIRI HAPALREAGYRSEVMYWG
HemN FCHKLCYFCG CNKIVT-----RQQHKADQYLDAL EQEIVHRAPL FAG--RHVSQLHWG
      * * . : * * * . : * * : * * : * * : * * : * * : * *

TbtI GGTASILGESEIESLYT CLRSEFDLSHVRETTIEGSPESL TPQKLRRLRELGFDRISIGV
TpdI GGTASILGPHEIESLYGTL SAEFDLSTVREATIEGSPESL DRDKLRLLRELGFNRISIGV
PbtM2 GGTASILS IDEIEAVAGALSSRFDM SGLTEATIEGSPESL DPDKLKLFR AAGFNRI SIGV
PbtM3 GGTATVLT EREIEQTYACLA AE L D L S S L A E A T I E G S P E S V D L A K L T F M R D L G F D R V S L G V
HemN GGTPTYLNKAQI SRLMKMLREN FQFNADAEI SIEVDPREI ELDVLDHLRAE GFNRLSMGV
      * * * : * * : * . * : * * * . * . . : * : * * * : * * * : * *

TbtI QSFDDQRLRRLGRAHSAEQAVEVVKNAHAAGFRNINIDLIVGFPGQ TDAEVAESVRTALT
TpdI QSFDDARLRRLGRAHAADQAL TAVQDAHEAGFTNINIDLIVGFPGQ TGQEVADSVRTALT
PbtM2 QAFDDARLRRI GRVHSAEQAVRAVEMAAEAGFDNINIDLIVGFPGQ EVDEVSHMIQRAVT
PbtM3 QSFDETRLRRI GRAHSAGQAVQ SVEAAHAAGFDNINIDLIVGF PDQSLEEVEEMIRRALD
HemN QDFNKEVQRLV NREQDEEFIFALLNHAREIGFTSTNIDL IYGLPKQTPESFAFTLKRVAE
      * * . : * : * * : . : : * * * . * * * * * * * * * . . . : : .

TbtI LPINHFSIYPYRASPGTILRKQVERGG-HL DLNRQLAAYITRDLLEEAGFPEYAMS YFG
TpdI LPINHFSIYPYRASPGTVLRKQVHRGA-QLDLNLQLQAYGIARELLEAAGFPEYAMS YFG
PbtM2 LPVNHFSVYYPYRPTNGTVMRKQVRRGNSEIDVDEQLRSYAYARDLLAEHGFDEYATAYFG
PbtM3 LPVNHFSVYSYRATEGTVMRKQIERSGTEILLEHQLRSYRLAADMLAAAGHPEYAVSYFG
HemN LNPDRLSVFN Y AHLPTIFAAQRKIKDADLPSPOQKLDILQETIAFLTQSGYQF IGMDHFA
      * : : * : : * . : : : . : : * : : * * . : : * . : : * .

TbtI APRCEADQA-----YYRLTMDWIGFGSGANS LLGHRYLAFRKGRLHAYNQNP
TpdI HPRCQSDEA-----YYQLRMDWIGFGSGANS LI GRRYLSY EKGKLAHYNTNP
PbtM2 GPRCESDEV-----YYKLTMDWIGFGSGANS LI GTRFLLNERGALHRFSAAP
PbtM3 VPRCLADEA-----YYRLSMDWIGFGTGANSLINQRYLLNGRGRMDF TSKP
HemN RPDDELAVAQREGVLHRNFQGYTTQGD TDL LGMGVSAI SMIGDCYAQNQKELKQYQQVD
      * . : : * : * * * . * * : : : : : : : : : :

TbtI LRFDVNAPASSPQLTLHWLSQALTTVEGMDARVYQERT-----GTPLRVACEE
TpdI LAFDINAPAHSPQLTLHFLSQA LTTAEGLDARLYQ QRT-----GVPLRTACSH
PbtM2 QRFDS DI PASSPHLTRHFLAQALTTVDGMDARTFQQRT-----GRSLRAACEE
PbtM3 GEFEVNLPAATGSLTVQWLPRALGTSEGIDAVTFQRRT-----GMSLRAACEE
HemN E-----QGNALWRGIALTRDDCIRRDVIKSLICNFRLDYAPIEKQWDLHFADYF
      . : * * : : : : : : : * : *

TbtI PEVQAYLRRMSEHGRLIIDRNGIRIHREDI----ARV IIALNWIDTPGGDQKV-TRLTPVSATS
TpdI PEVMTYLERMNNHGR LIADHNGIRLHRDDI----AQTFIALNW IPTDTPNEVIPLTPSPT
PbtM2 PAVRRMLEQINRRGR LIIDSRGIRLHRDDM----ASTYITMNSVDLYAATEQIGG-----
PbtM3 PDLNAFLRQVNRFGDLVVDRTGIRLADDDRSSVLSRTFAAMGWVS-----
HemN AEDLKL LAPLAKDGLVDVDEKGIQVTAKGRLLIRNICMCFD TYLRQKARMQQFSRVI---
      * : . * : * * * : : . : : : : : : : : : :

```

**Figure S2. Sequence alignment of select class C rSAM MTs.** Proteins shown include TbtI from the hypothetical thiomuracin producer *Thermobispora bispora* (WP\_013130805.1), TpdI from known thiomuracin producer *Nonomuraea* sp. Bp3714-39 (ACS83777.1), PbtM2/M3 from GE2270A producer *Nonomuraea* sp. WU8817 (AGY49586.1/AGY49595.1), and HemN from *Escherichia coli* (WP\_001502804.1). Cys residues involved in [4Fe-4S] cluster formation are highlighted yellow. TbtI residues chosen for Ala substitution are shown in red. HemN residues within 5 Å of SAM2 are shown in blue.

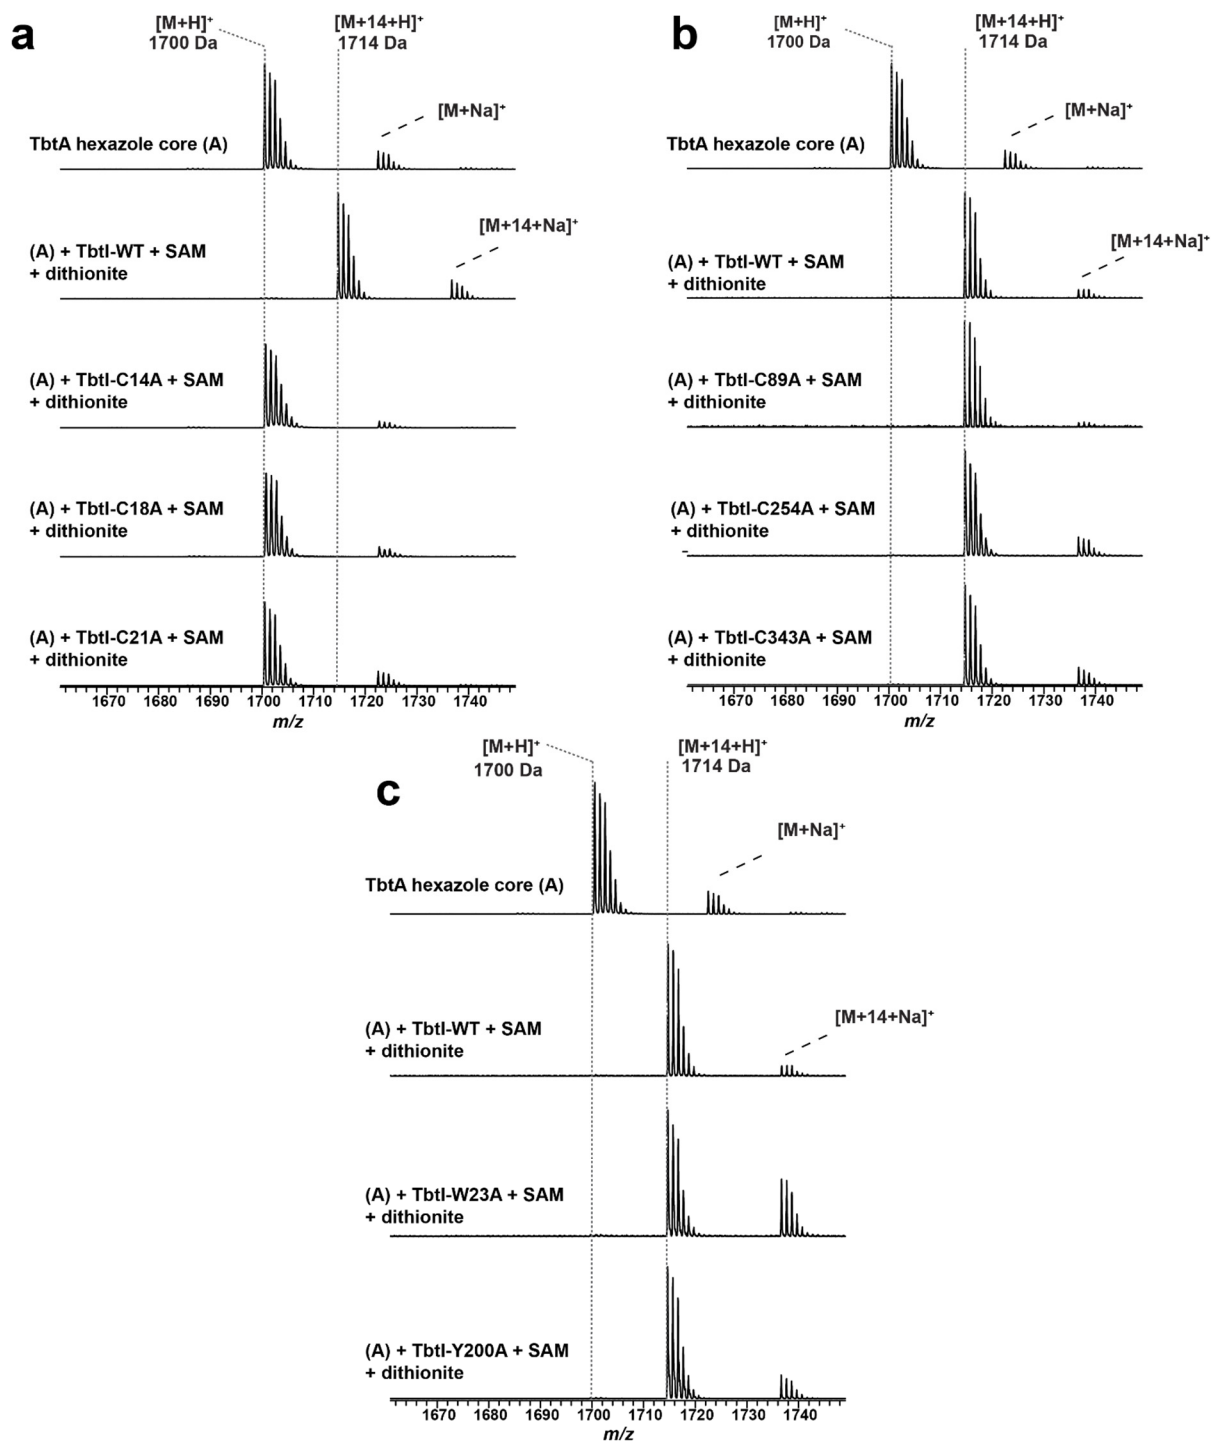

**Figure S3. MALDI-TOF MS analysis of the products generated by TbtI variants.** (a) Spectra of TbtA hexazole treated with wild type (wt) TbtI or TbtI variants in which the Cys residues expected to be involved in binding to the [4Fe-4S] cluster were substituted with Ala. (b) Spectra of TbtA hexazole treated with wt TbtI or TbtI variants in which the remaining Cys residues were substituted with Ala. (c) Spectra of TbtA hexazole treated with wt TbtI or variants in which conserved Tyr/Trp residues were individually substituted with Ala without loss of activity. Very similar results were obtained for the Cys variants when DTT was removed from the assays.

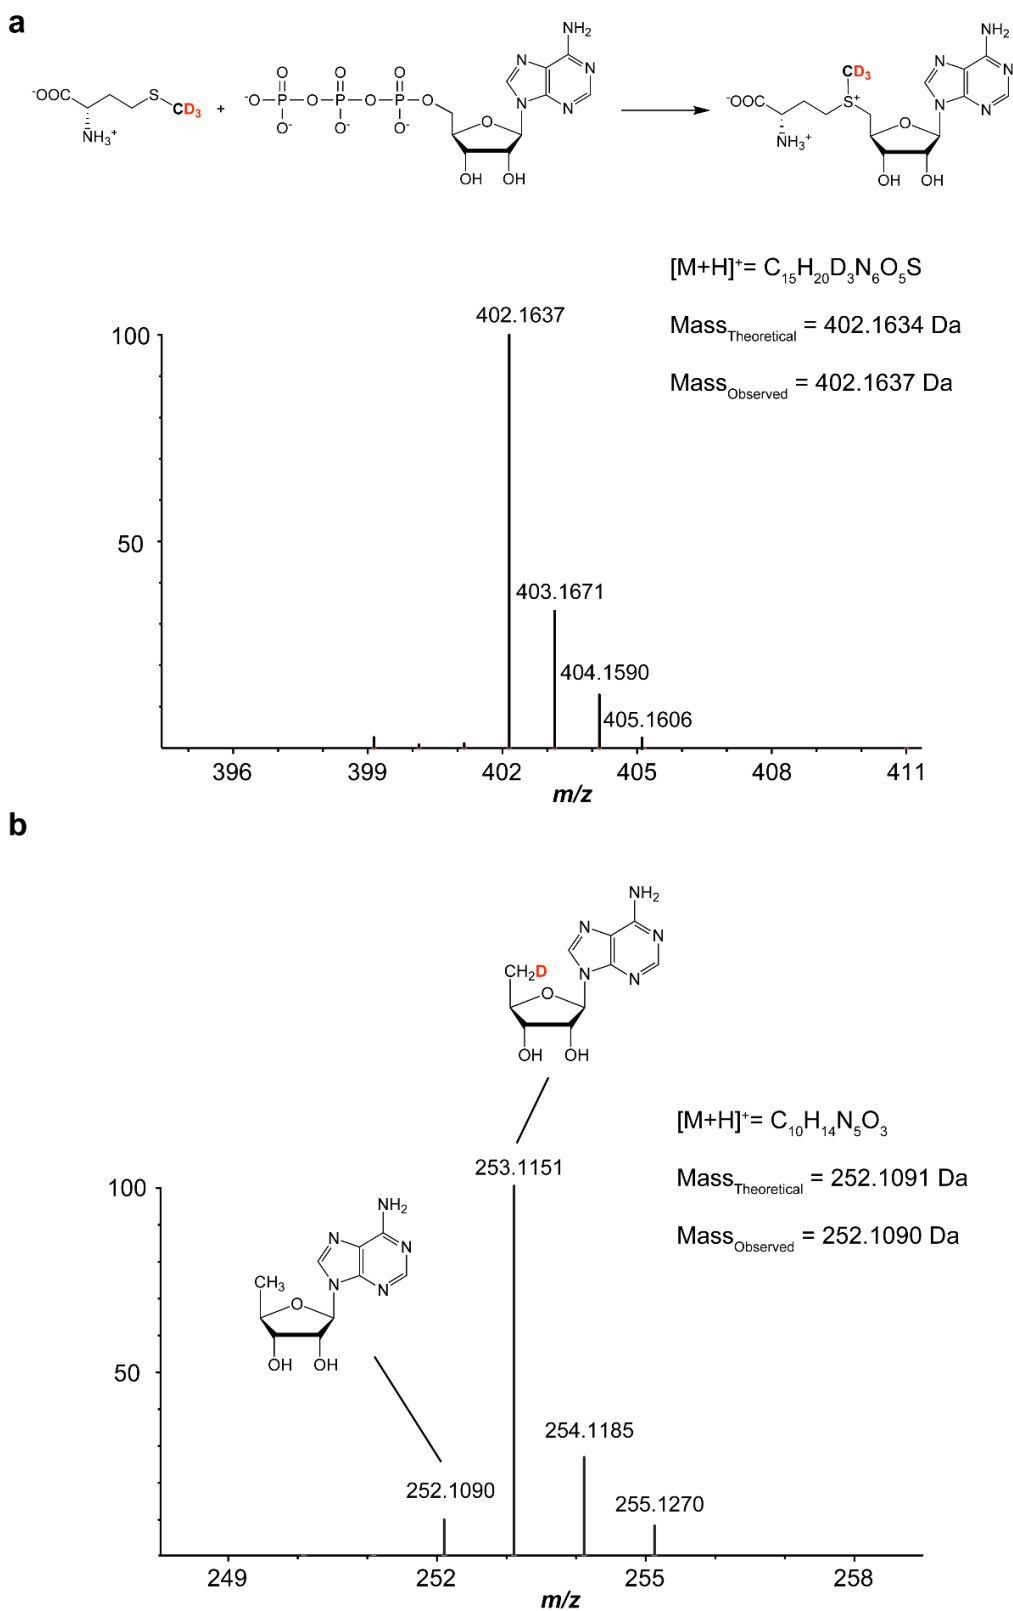

**Figure S4. (a)** ESI-MS of the CD<sub>3</sub>-SAM starting material. Error, 0.7 ppm. **(b)** ESI-MS analysis of 5'-dA produced during the methylation of TbtA by TbtI in the presence of CD<sub>3</sub>-SAM. Error, 0.4 ppm. The deuterium content of CD<sub>3</sub>-SAM was calculated as follows:  $(\text{Peak intensity}_{m/z=402}) / [(\text{Peak intensity}_{m/z=402}) + (\text{Peak intensity}_{m/z=399}) + (\text{Peak intensity}_{m/z=400}) + (\text{Peak intensity}_{m/z=401})]$ .

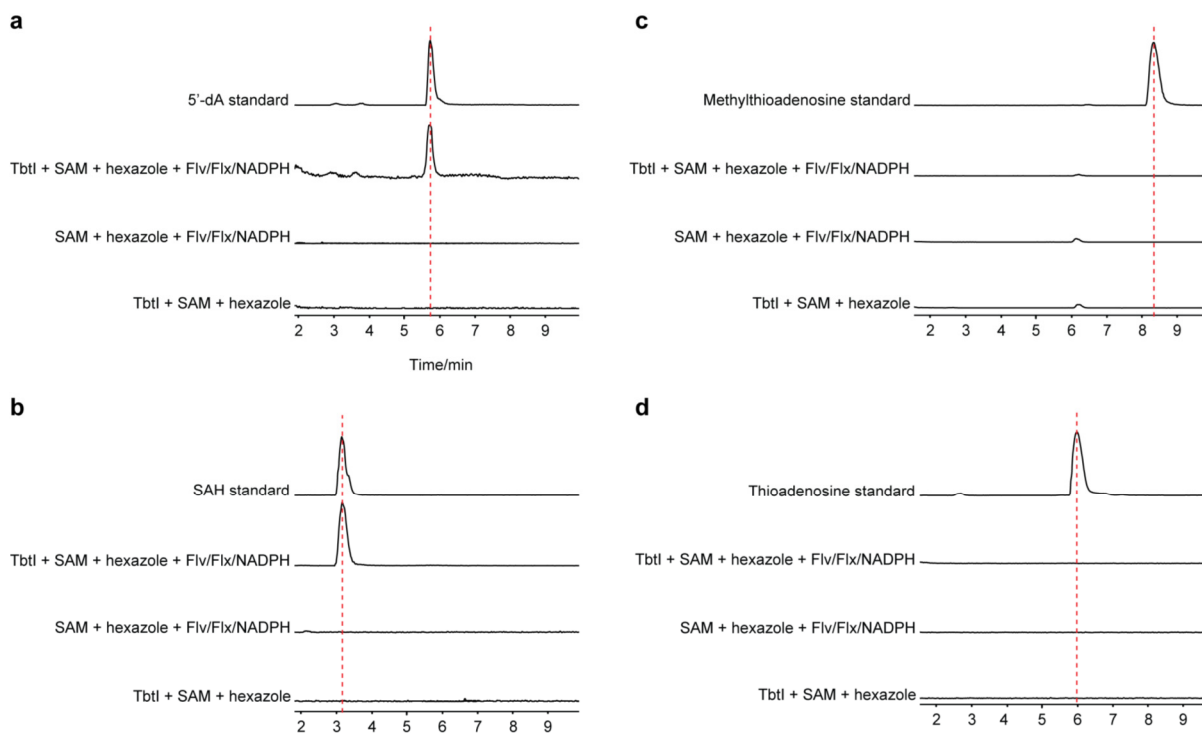

**Figure S5. Products of the TbtI reaction. (a-b)** Extracted ion chromatograms to analyze production of 5'-dA and SAH showed their generation was dependent on the presence of both TbtI and the reducing system. **(c-d)** Extracted ion chromatograms to analyze potential production of methylthioadenosine and thioadenosine did not show the presence of these products under the reaction conditions.

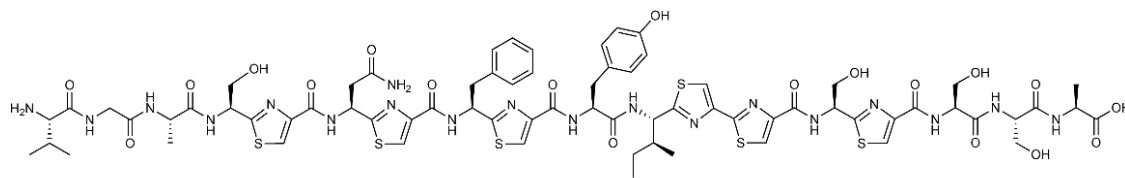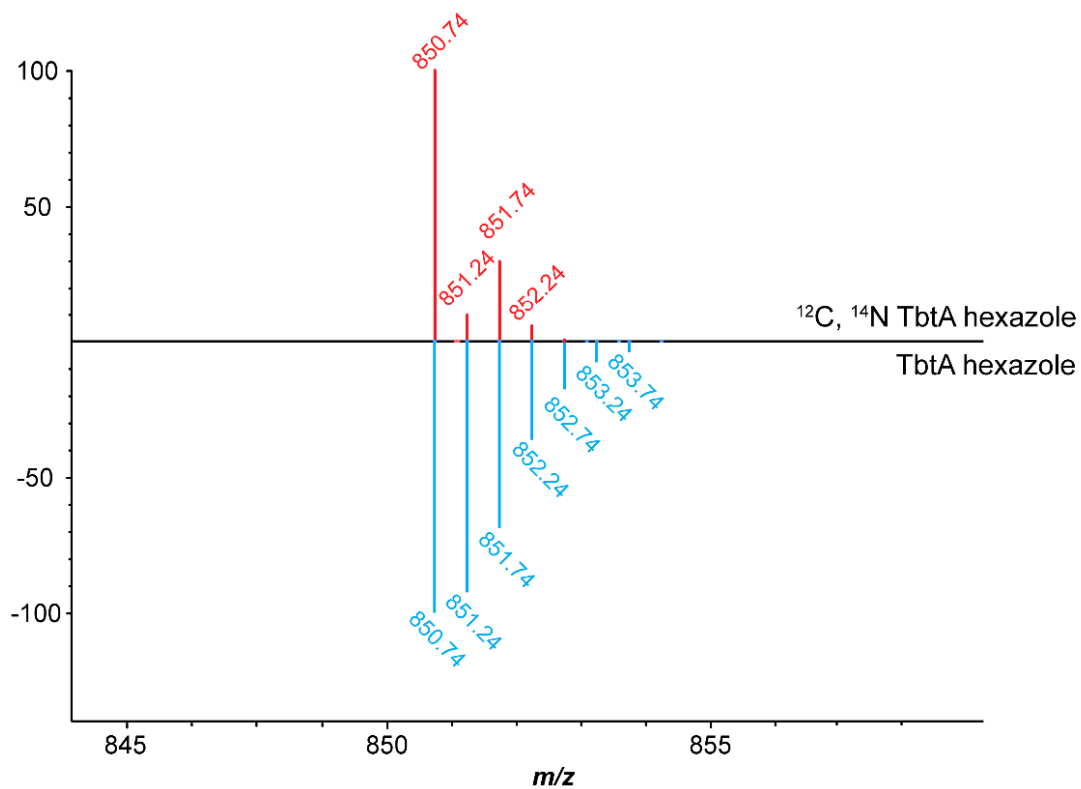

**Figure S6.** ESI-MS analysis of the doubly charged ( $^{13}\text{C}$ ,  $^{15}\text{N}$ )-depleted TbtA hexazole **1** (top, red) and natural abundance TbtA hexazole (bottom, blue). See Table S2 for calculated and observed masses.

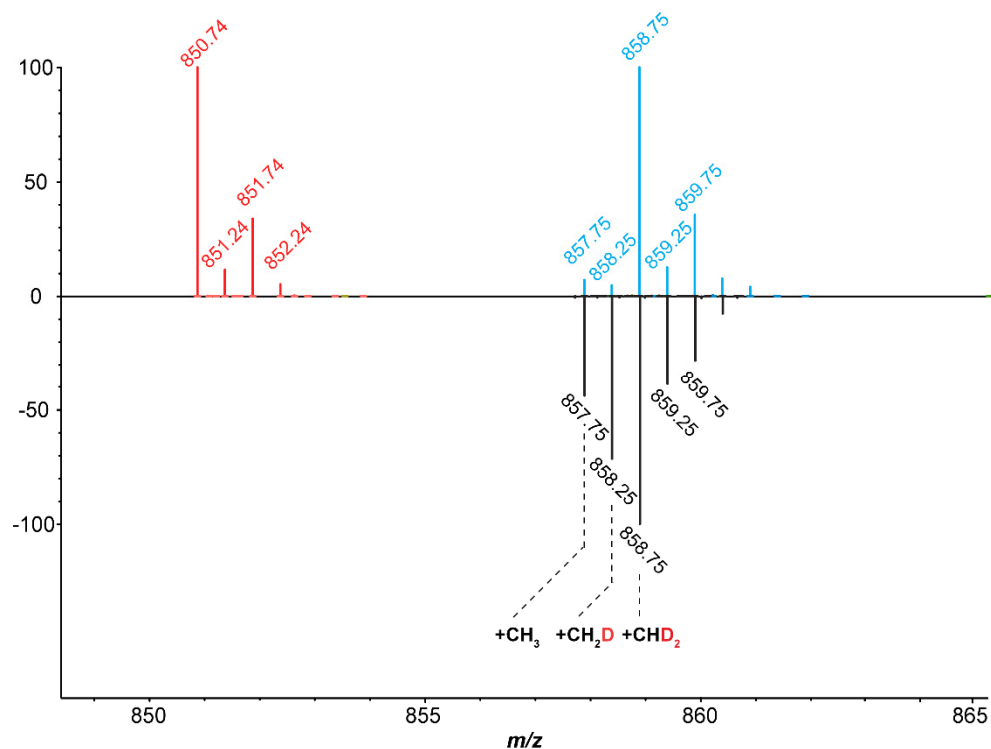

**Figure S7. ESI-MS spectra to investigate methyl group solvent exchange.** Spectra showing the doubly charged core peptide of the TbtA hexazole substrate (red) and product obtained with CD<sub>3</sub>-SAM in H<sub>2</sub>O after a 1 h reaction (blue) or the product from this reaction re-exposed to the same reaction for 16 h (black). See Table S2 for calculated and observed masses.



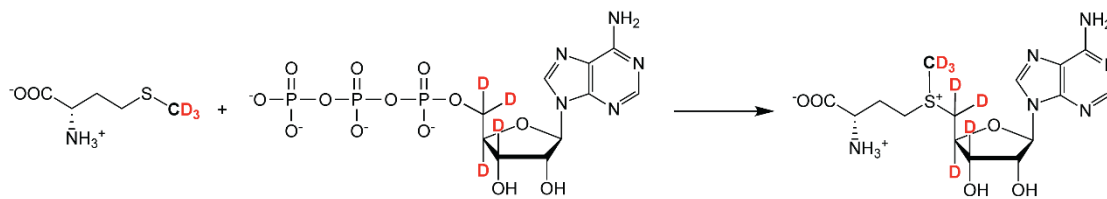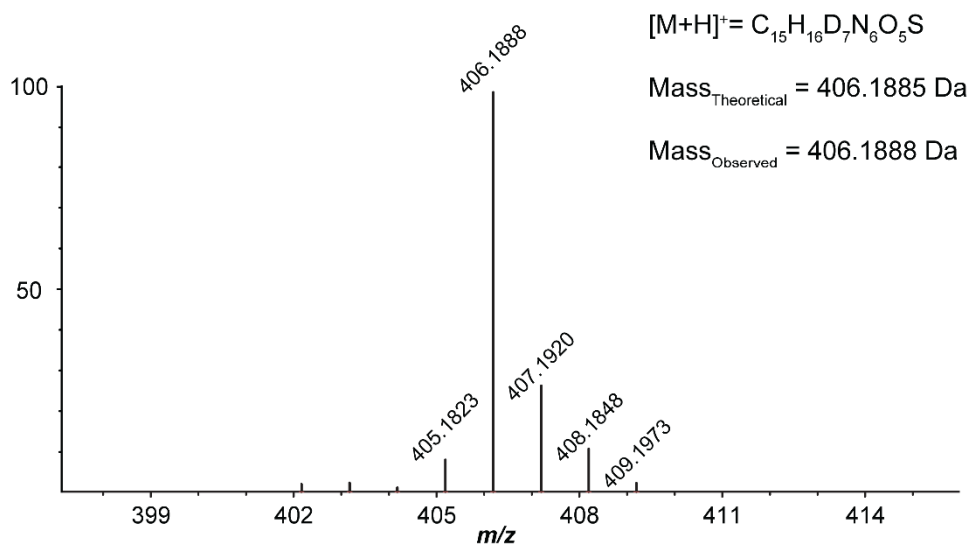

**Figure S8. Synthesis and ESI-MS analysis of  $CD_3$ -5',5',4',3'- $D_4$ -SAM.** Error, 0.7 ppm. The deuterium content of  $CD_3$ -5',5',4',3'- $D_4$ -SAM was calculated as follows taking into account that some of the ion at 406 might arise from a  $^{13}C$ -containing isotopologue of the ion at  $m/z$  405:  $[(\text{Peak intensity}_{m/z=406}) - (0.3 \times \text{Peak intensity}_{m/z=405})] / [(\text{Peak intensity}_{m/z=406}) + (\text{Peak intensity}_{m/z=405}) + (\text{Peak intensity}_{m/z=404}) + (\text{Peak intensity}_{m/z=403}) + (\text{Peak intensity}_{m/z=402})]$ .

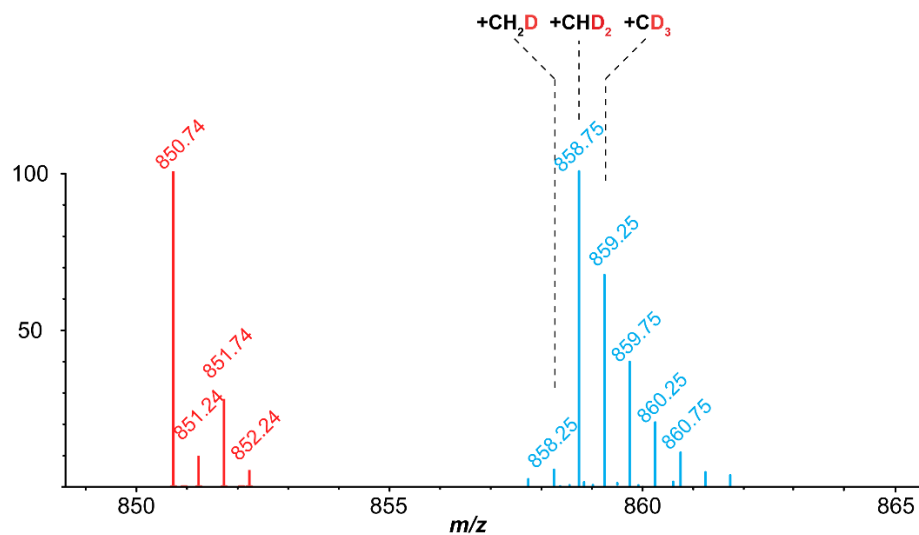

**Figure S9. ESI-MS spectra ruling out transfer of a non-exchangeable hydrogen derived from the protein.** Spectra showing the doubly charged core peptide of the TbtA hexazole substrate **1** (red) and product obtained with a 20-fold excess of substrate and CD<sub>3</sub>-SAM with TbtI in buffered D<sub>2</sub>O.

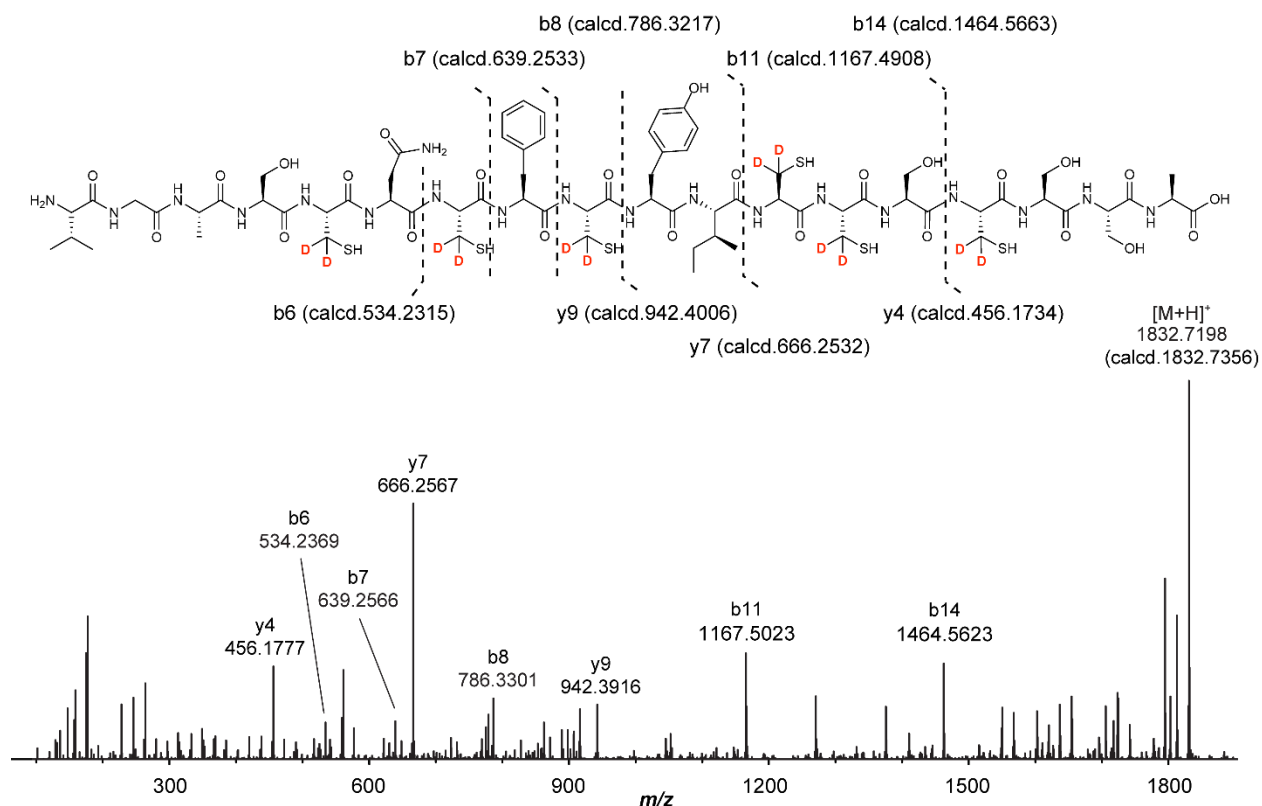

| Species            | Predicted mass | Observed mass | Error (ppm) |
|--------------------|----------------|---------------|-------------|
| [M+H] <sup>+</sup> | 1832.7356      | 1832.7198     | 8.6         |
| b6                 | 534.2315       | 534.2369      | 10.1        |
| b7                 | 639.2533       | 639.2566      | 5.2         |
| b8                 | 786.3217       | 786.3301      | 10.7        |
| b11                | 1167.4908      | 1167.5023     | 9.9         |
| b14                | 1464.5663      | 1464.5623     | 2.7         |
| y4                 | 456.1734       | 456.1777      | 9.4         |
| y7                 | 666.2532       | 666.2567      | 5.3         |
| y9                 | 942.4006       | 942.3916      | 9.6         |

**Figure S10. Tandem ESI-MS on TbtA core peptide containing six D<sub>2</sub>-Cys residues.** The tandem MS analysis was performed on the precursor peptide pre-treated with endoproteinase GluC to remove most of the leader peptide.<sup>2</sup> Analysis of the tandem MS data reveals that six D<sub>2</sub>-Cys were incorporated into the peptide. The deuterium content at Cys4 was estimated by determining the deuterium content of the b7 ion in comparison to the deuterium content of the b6 ion: [peak intensity of the b<sub>7</sub> ion (*m/z* = 639)/ (peak intensity of the b<sub>7</sub> ion (*m/z* = 639) + the peak intensity of b<sub>7</sub> - 1 ion (*m/z* = 638))] - [peak intensity of the b<sub>6</sub> ion (*m/z* = 534)/ (peak intensity of the b<sub>6</sub> ion (*m/z* = 534) + the peak intensity of b<sub>6</sub> - 1 ion (*m/z* = 533))].

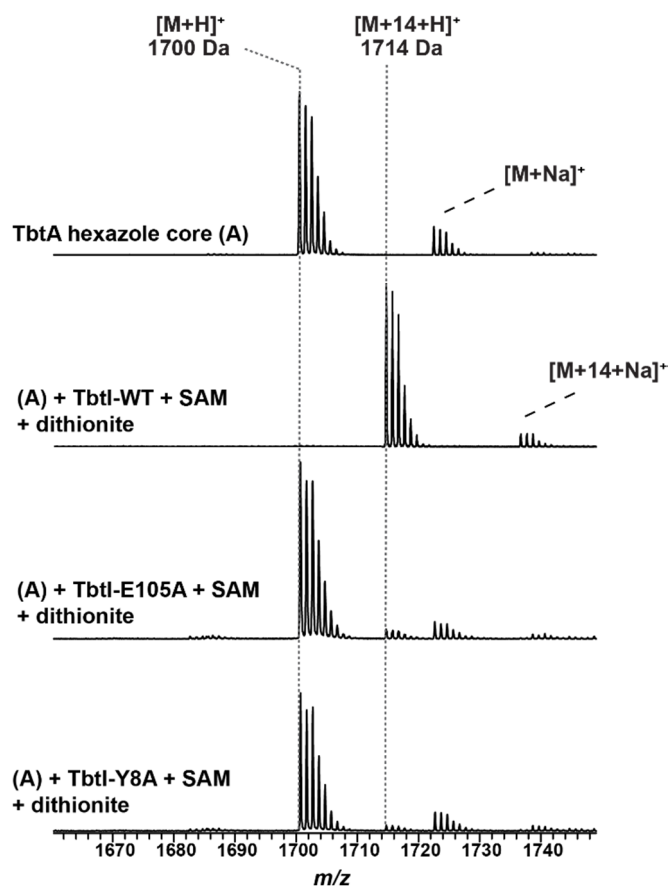

**Figure S11. MALDI-TOF MS analysis of the products generated by TbtI variants.** Spectra of TbtA treated with wt TbtI or TbtI variants in which the class C rSAM-conserved Glu and Tyr residues were substituted with Ala. According to the crystal structure of HemN, these residues are near the SAM-binding site.

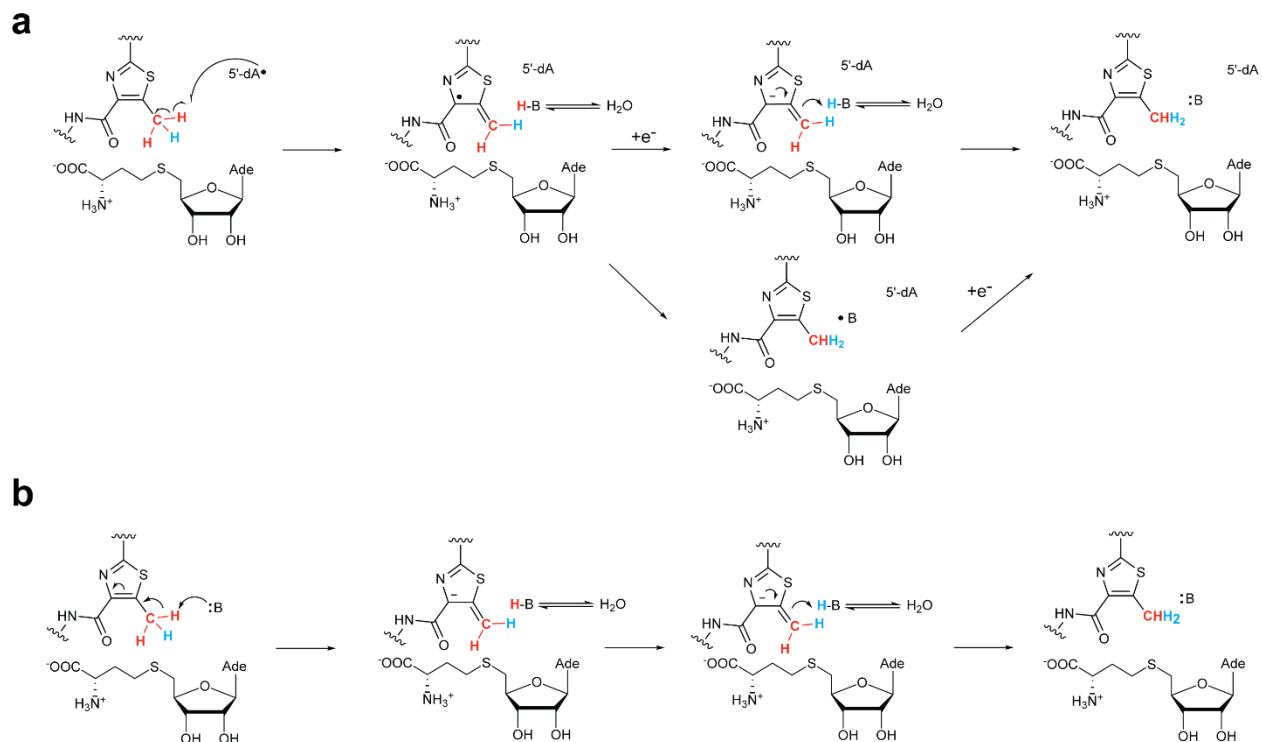

**Figure S12. Proposed mechanisms for exchange of the methyl protons of the product peptide. (a)** The methylated product and SAM1 can bind to the enzyme, SAM1 can be cleaved to initiate the hydrogen atom abstraction from the methylated peptide. Its methyl group would be expected to occupy a very similar position as the methyl group of SAM2 during normal turnover. Reduction of the resulting radical to the anion and protonation results in exchange (analogous to pathway *a* in Figure 2), or hydrogen atom abstraction from a redox active residue in the active site (analogous to pathway *b*, Figure 2) would result in exchange. **(b)** An alternative mechanism involves deprotonation of the methyl group, the reverse of the protonation step that provides the product in pathway *a*. The mechanism in panel **(a)** requires SAM cleavage whereas the mechanism in **(b)** does not. Unfortunately, we were not able to determine whether a hydrogen is transferred from the methyl group to 5'-dA during prolonged reactions because of extensive abortive SAM cleavage. Ade = adenine.

**Table S1. Oligonucleotide primers used in this study.** All sequences are provided 5' to 3'. F indicates a forward primer while R indicates the reverse primer.

| <b>Primer Name</b>  | <b>Oligonucleotide Sequence</b>            |
|---------------------|--------------------------------------------|
| <i>tbtI</i> C14A F  | ATATCCCGTTTCGCTAACTCTAAATGCCACTTCTGCGACTGG |
| <i>tbtI</i> C14A R  | CATTTAGAGTTAGCGAACGGGATATTCACATACAGCAGCAG  |
| <i>tbtI</i> C18A F  | GTA ACTCTAAAGCCCACTTCTGCGACTGGGTTGTCCAAATC |
| <i>tbtI</i> C18A R  | TCGCAGAAGTGGGCTTTAGAGTTACAGAACGGGATATTAC   |
| <i>tbtI</i> C21A F  | AATGCCACTTCGCCGACTGGGTTGTCCAAATCCCGGTGCGT  |
| <i>tbtI</i> C21A R  | ACAACCCAGTCGGCGAAGTGGCATTTAGAGTTACAGAACGG  |
| <i>tbtI</i> C89A F  | CTCTGTATACGGCCCTGCGTTCAGAATTCGATCTGTGCGAC  |
| <i>tbtI</i> C89A R  | TCTGAACGCAGGGCCGTATACAGAGATTCGATTTGCTTTC   |
| <i>tbtI</i> C254A F | GTGCACCGCGTGCCGAAGCAGATCAGGCATATTACCGCCTG  |
| <i>tbtI</i> C254A R | TGATCTGCTTCGGCACGCGGTGCACCGAAGTAGCTCATCGC  |
| <i>tbtI</i> C343A F | TGCGTGTCGCAGCTGAAGAACCGGAAGTGCAAGCCTACCTG  |
| <i>tbtI</i> C343A R | TCCGGTTCTTCAGCTGCGACACGCAGCGGCGTACCGGTACGT |
| <i>tbtI</i> W23A F  | ACTTCTGCGACGCGTTGTCCAAATCCCGGTGCGTGATCTG   |
| <i>tbtI</i> W23A R  | ATTTGGACAACCGCGTCGCAGAAGTGGCATTTAGAGTTACA  |
| <i>tbtI</i> Y200A F | ATTTTAGTATCGCTCCGTACCGTGCATCCCCGGGTACCATT  |
| <i>tbtI</i> Y200A R | GCACGGTACGGAGCGATACTAAAATGGTTAATCGGCAGCGT  |
| <i>tbtI</i> E105A F | AAACCACGATTGCAGGTAGTCCGGAATCCCTGACCCCGCAG  |
| <i>tbtI</i> E105A R | TCCGGACTACCTGCAATCGTGGTTTCGCGGACGTGCGACAG  |
| <i>tbtI</i> Y8A F   | CGCTGCTGCTGGCTGTGAATATCCCGTTCTGTA ACTCTAAA |
| <i>tbtI</i> Y8A R   | GGGATATTCACAGCCAGCAGCAGCGGGCGCGTCAT        |

**Table S2: Expected and observed masses in Figures 3, 4, S5, and S6.** Each species listed below is doubly charged.

| Species                                          | Calculated mass (Da) | Observed mass (Da) | Error (ppm) |
|--------------------------------------------------|----------------------|--------------------|-------------|
| Hexazole                                         | 850.7369             | 850.7380           | 1.3         |
| Hexazole + CH <sub>3</sub>                       | 857.7448             | 857.7416           | 3.7         |
| Hexazole + CH <sub>2</sub> D                     | 858.2479             | 858.2437           | 4.9         |
| Hexazole + CHD <sub>2</sub>                      | 858.7510             | 858.7507           | 0.3         |
| Hexazole + CD <sub>3</sub>                       | 859.2542             | 859.2537           | 0.6         |
| D <sub>6</sub> -Hexazole                         | 853.7558             | 853.7578           | 2.4         |
| D <sub>6</sub> -Hexazole + CH <sub>3</sub> - D   | 860.2605             | 860.2607           | 0.3         |
| D <sub>6</sub> -Hexazole + CH <sub>2</sub> D - D | 860.7636             | 860.7611           | 2.9         |
| D <sub>6</sub> -Hexazole + CHD <sub>2</sub> - D  | 861.2667             | 861.2658           | 1.1         |
| D <sub>6</sub> -Hexazole + CD <sub>3</sub> - D   | 861.7699             | 861.7624           | 8.7         |

## Supporting References

- (1) Grove, T. L.; Livada, J.; Schwalm, E. L.; Green, M. T.; Booker, S. J.; Silakov, A. *Nat. Chem. Biol.* **2013**, *9*, 422.
- (2) Hudson, G. A.; Zhang, Z.; Tietz, J. I.; Mitchell, D. A.; van der Donk, W. A. *J. Am. Chem. Soc.* **2015**, *137*, 16012.
